# Supplementary material for: The Dynamics of Latifundia Formation
Source: PubMed Central journal article supplement (PMC3869715; doi:10.1371/journal.pone.0082863), 2013-12-20

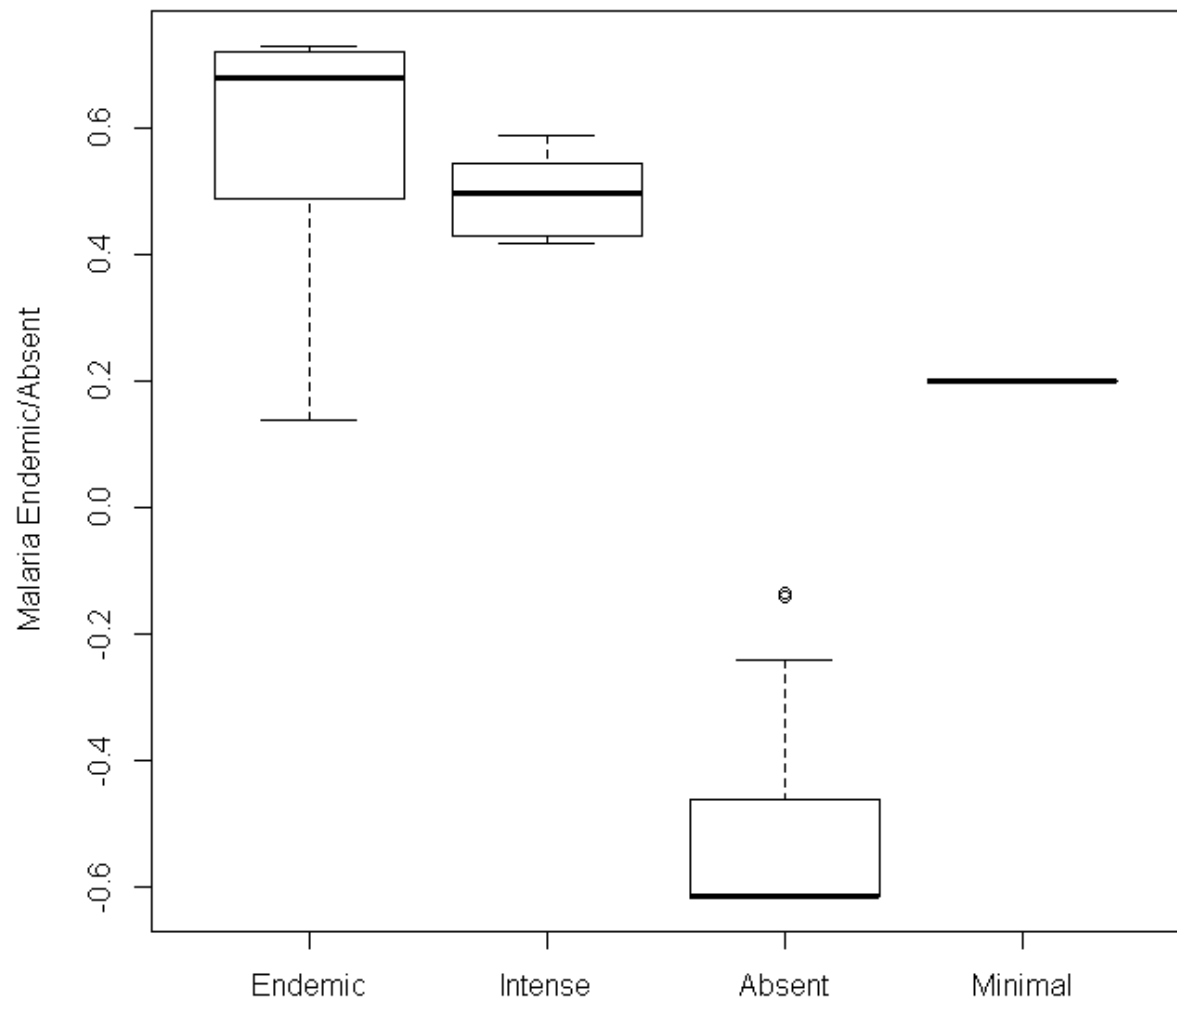

Supplement: pone.0082863.s001.pdf [file pone.0082863.s001.pdf]
